# **A reverse-transcription loop-mediated isothermal amplification (RT-LAMP) assay for the rapid detection of SARS-CoV-2 within nasopharyngeal and oropharyngeal swabs at Hampshire Hospitals NHS Foundation Trust**

Veronica L. Fowler<sup>1,2\*a</sup>, Bryony Armson<sup>1,3a</sup>, Jose L. Gonzales<sup>4</sup>, Emma L. Wise<sup>1,5</sup>, Emma L. A. Howson<sup>9,10</sup>, Zoe Vincent-Mistiaen<sup>1,6</sup>, Sarah Fouch<sup>1,7</sup>, Connor J. Maltby<sup>1</sup>, Seden Grippon<sup>1</sup>, Simon Munro<sup>1</sup>, Lisa Jones<sup>1</sup>, Tom Holmes<sup>1</sup>, Claire Tillyer<sup>1</sup>, Joanne Elwell<sup>1</sup>, Amy Sowood<sup>1</sup>, Helio Santos<sup>1</sup>, Oliver de Peyer<sup>1</sup>, Sophie Dixon<sup>1</sup>, Thomas Hatcher<sup>1</sup>, Suvetha Sivanesan<sup>1</sup>, Helen Patrick<sup>1</sup>, Shailen Laxman<sup>8</sup>, Charlotte Walsh<sup>9</sup>, Michael Andreou<sup>8</sup>, Nick Morant<sup>9</sup>, Duncan Clark<sup>9</sup>, Nathan Moore<sup>1</sup>, Rebecca Houghton<sup>1</sup>, Nicholas Cortes<sup>1,6</sup>, Stephen P. Kidd<sup>1\*</sup>

<sup>1</sup>Hampshire Hospitals NHS Foundation Trust, Department of Microbiology, Basingstoke and Winchester, UK

<sup>2</sup>Eco Animal Health, The Grange, 100 The High Street, London, N14 6BN, UK

<sup>3</sup>School of Veterinary Medicine, University of Surrey, Guildford, GU2 7AL, UK

<sup>4</sup>Wageningen Bioveterinary Research (WBVR), PO Box 65, 8200 AB, Lelystad, The Netherlands

<sup>5</sup>School of Biosciences and Medicine, University of Surrey, Guildford, GU2 7XH, UK

<sup>6</sup>Gibraltar Health Authority, Gibraltar, UK

<sup>7</sup>School of Pharmacy and Biomedical Sciences, University of Portsmouth, UK

<sup>8</sup>OptiSense Limited, Horsham, West Sussex, UK

<sup>9</sup>GeneSys Biotech Limited, Camberley, Surrey, UK

<sup>10</sup>The Pirbright Institute, Ash Road, Pirbright, Woking GU24 0NF, UK

\*Corresponding authors:

E-mail: [veronica.fowler@ecoanimalhealth.com](mailto:veronica.fowler@ecoanimalhealth.com) and [stephen.kidd@hhft.nhs.uk](mailto:stephen.kidd@hhft.nhs.uk)

<sup>a</sup>Joint first authorship

## **Running title**

RT-LAMP assay for the rapid detection of SARS-CoV-2.

## **Keywords**

SARS-CoV-2, COVID-19, RT-LAMP, rapid diagnostics, near patient testing, direct RNA detection

## Abstract

The COVID-19 pandemic has illustrated the importance of rapid, accurate diagnostic testing for the effective triaging and cohorting of patients and timely tracking and tracing of cases. However, a surge in diagnostic testing quickly resulted in worldwide competition for the same sample preparation and real-time RT-PCR diagnostic reagents (rRT-PCR). Consequently, Hampshire Hospitals NHS Foundation Trust, UK sought to diversify their diagnostic portfolio by exploring alternative amplification chemistries including those that permit direct testing without RNA extraction. This study describes the validation of a SARS-CoV-2 RT-LAMP assay, which is an isothermal, autocycling, strand-displacement nucleic acid amplification technique which can be performed on extracted RNA, “RNA RT-LAMP” or directly from swab “Direct RT-LAMP”. Analytical specificity (ASp) of this new RT-LAMP assay was 100% and analytical sensitivity (ASe) was between  $1 \times 10^1$  and  $1 \times 10^2$  copies when using a synthetic DNA target. The overall diagnostic sensitivity (DSe) and specificity (DSp) of RNA RT-LAMP was 97% and 99% respectively, relative to the standard of care (SoC) rRT-PCR. When a  $C_T$  cut-off of 33 was employed, above which increasingly, evidence suggests there is a very low risk of patients shedding infectious virus, the diagnostic sensitivity was 100%. The DSe and DSp of Direct-RT-LAMP was 67% and 97%, respectively. When setting  $C_T$  cut-offs of  $\leq 33$  and  $\leq 25$ , the DSe increased to 75% and 100%, respectively. Time from swab-to-result for a strong positive sample ( $C_T < 25$ ) was < 15 minutes. We propose that RNA RT-LAMP could replace rRT-PCR where there is a need for increase in throughput, whereas Direct RT-LAMP could be used as a screening tool for triaging patients into appropriate hospitals wards, at GP surgeries and in care homes, or for population screening to identify highly contagious individuals (“super shedders”). Direct RT-LAMP could also be used during times of high prevalence to save critical extraction and rRT-PCR reagents by “screening” out those strong positives from diagnostic pipelines.

## 1. Introduction

In December 2019, an unusual cluster of pneumonia cases were reported by the Chinese Centre for Disease Control (China CDC) in the city of Wuhan, Hubei province<sup>1</sup> It was quickly established by sequencing of airway epithelial cells that these patients were infected with a novel *betacoronavirus*<sup>2</sup> which was named by the International Committee on Taxonomy of Viruses as severe acute respiratory syndrome coronavirus 2 (SARS-CoV-2) due to the close genetic relatedness to SARS-CoV<sup>3</sup>. Since its first discovery, SARS-CoV-2 has spread around the globe reaching pandemic status, and by June 2020 has infected 9 million people and caused more than 460,000 deaths according to The World Health Organisation situation report (accessed 24<sup>th</sup> June 2020).

Genomic regions suitable for targeting with molecular tests such as real-time reverse-transcription polymerase chain reaction (rRT-PCR) were published by Corman *et al*<sup>4</sup> early in the outbreak and comprised the *RdRp*, *E* and *N* genes. Diagnostic tests developed targeting these regions have since been utilised for routine use in many reference and hospital laboratories around the world. However, with the huge surge in diagnostic testing, laboratories began competing for the same test components and certain reagents such as RNA extraction kits became difficult to source. Consequently, to ensure a robust, resilient diagnostic service with an increased capacity, Hampshire Hospitals NHS Foundation Trust (HHFT) sought to diversify the portfolio of testing strategies by exploring alternative chemistries which have separate reagent supplier pathways to those of rRT-PCR, and which also permit direct testing without the need for RNA extraction.

Reverse-transcription loop-mediated isothermal amplification (RT-LAMP) satisfied these requirements by combining reverse-transcription and autocycling, isothermal, strand displacement DNA amplification to produce a highly sensitive, versatile and robust test<sup>5-7</sup>. LAMP chemistry is more resistant to inhibitors than rRT-PCR, enabling simplification and even removal of extraction procedures<sup>8</sup>. LAMP has been applied for the detection of a wide range of pathogens, including positive-sense RNA viruses and has been used extensively in the veterinary and plant industry<sup>9-11</sup>

and more recently in human diagnostics <sup>12–16</sup>. Herein we describe the validation of a novel SARS-CoV-2 RT-LAMP assay which can be performed on extracted RNA, or directly from viral transport medium (VTM) taken from combined oropharyngeal and nasopharyngeal swabs (ONSwab).

## 2. Methods

### 2.1. Virus isolates and clinical specimens

Diagnostic sensitivity (DSe) and specificity (DSp) were determined using ONSwabs submitted to HHFT, previously confirmed as either SARS-CoV-2 positive or negative by rRT-PCR. All ONSwabs were collected in Sigma Virocult® medium (Sigma-Aldrich Inc.).

Analytical sensitivity (ASe) of RNA-RT-LAMP was determined using a ten-fold dilution series of SARS-CoV-2 RNA purified from virus infected tissue culture fluid (BetaCoV/England/02/2020) obtained from Public Health England (Lot 07.02.2020) and a titration of a synthetic DNA fragment containing the SARS-CoV-2 RT-LAMP target in nuclease free water (NFW) (Integrated DNA Technologies).

ASe of Direct RT-LAMP was determined using a two-fold dilution series (1:8 to 1:2048) of VTM taken from a SARS-CoV-2 positive ONSwab sample. A standard curve (Qnostics, Scotland, UK) was run on the rRT-PCR, allowing quantification of RNA in digital copies ( $\log_{10}$  dC/ml). Analytical specificity (ASp) was determined using the NATtrol™ Respiratory Verification Panel (ZeptoMetrix Corporation, New York, United States) containing pathogens causing indistinguishable clinical signs to COVID-19 (n=22) and a pool of meningitis encephalitis causative agents (n=7) (Table 1).

Repeatability, inter-operator and inter-platform reproducibility were determined using combined ONSwabs submitted to HHFT, previously confirmed as SARS-CoV-2 positive, and a SARS-CoV-2 Medium Q Control 01 positive control (Qnostics, Scotland, UK) (diluted 1 in 10 and 1 in 100).

Preliminary evaluation of Direct RT-LAMP for detection of SARS-CoV-2 in other clinical samples was performed using fourteen saliva samples collected from hospital in-patients confirmed from paired ONSwabs as positive and negative for SARS-CoV-2. Collection of saliva involved the patient providing

a fresh saliva sample into a 10 ml universal container. Prior to analysis the saliva was diluted 1:5, 1:10 and 1:20 in NFW.

## **2.2. RNA extraction**

RNA was extracted using the Maxwell® RSC Viral Total Nucleic Acid Purification Kit (Promega UK Ltd., Southampton, UK) according to manufacturer's instructions. Briefly, 200 µl of sample was added to 223 µl of prepared lysis solution (including 5 µl per reaction of Genesig® Easy RNA Internal extraction control, Primerdesign Ltd, Chandler's Ford, UK). Samples were then inactivated for 10 minutes at room temperature within the safety cabinet and 10 minutes at 56°C on a heat block before automated RNA extraction using a Maxwell® RSC 48 Instrument (Promega UK Ltd., Southampton, UK). RNA was eluted in 50 µl of NFW. In the case of saliva, RNA was extracted from 200 µl of saliva diluted 1:20, as saliva volume was insufficient unless a dilution was performed.

## **2.3. Real-time reverse-transcription PCR (rRT-PCR)**

rRT-PCR assays were performed in single replicates using 5 µl of RNA template with the COVID-19 genesig® Real-Time PCR assay (Primerdesign Ltd, Chandler's Ford, UK) according to the manufacturer's guidelines, on a MIC qPCR Cycler (Bio Molecular Systems, London, UK). Single replicates were performed to ensure an adequate supply of reagents. The cycling conditions were adjusted to the following: a reverse-transcription (RT) step of 10 minutes at 55°C, a hot-start step of 2 minutes at 95°C, and then 45 cycles of 95°C for 10 seconds and 60°C for 30 seconds. The Genesig® COVID-19 positive control included in the kit, a negative extraction control, and a no template control were also included on each rRT-PCR run.

## **2.4. Reverse-transcription loop-mediated isothermal amplification (RT-LAMP)**

RT-LAMP reactions were performed using OptiGene Ltd. (Camberley, UK) COVID-19\_RT-LAMP kits which target the *ORF1ab* region of the SARS-CoV-2 genome: (i) COVID-19\_RNA RT-LAMP KIT-500 kit

(for use on extracted RNA) and (ii) COVID-19\_Direct RT-LAMP KIT-500 kit (for use on diluted combined ONSwabs). The COVID-19\_Direct RT-LAMP KIT-500 kit contains an additional proprietary enhancing enzyme.

Each RT-LAMP reaction consisted of: 17.5 µl of RT-LAMP Isothermal Mastermix (containing 8 units of GspSSD2.0 DNA Polymerase, 7.5 units of Opti-RT reverse transcriptase and a proprietary fluorescent dsDNA intercalating dye), 2.5 µl of 10X COVID-19 Primer Mix, and 5 µl of RNA/sample. RT-LAMP reactions were performed in duplicate at 65°C for 20 mins on a Genie® HT or portable Genie® III (OptiGene Ltd., UK). An exponential increase in fluorescence ( $\Delta F$ ) indicated a positive reaction, which was quantified by a time to positivity ( $T_p$ ) value, called at the point where the fluorescence level on the amplification curve crosses the threshold of 5000. To confirm the specificity of the amplification reaction, an anneal curve was performed: RT-LAMP products were heated to 98°C for 1 min, then cooled to 80°C decreasing the temperature by 0.05°C/s.

Genie® embedded software (OptiGene Ltd., UK) was utilised to analyse RT-LAMP results and define thresholds for result calling. All RT-LAMP reactions were performed at least in duplicate, and a sample was considered positive when a  $T_p$  was observed in at least one replicate with amplification above 5000 fluorescence points and had an anneal temperature of between 81.50°C and 84.05°C with a derivative above 2500 F/°C.

For RNA RT-LAMP 5 µl of extracted RNA was added to the reaction and for Direct RT-LAMP 5 µl of VTM from the swab diluted 1:20 in NFW, or saliva diluted 1:5, 1:10 and 1:20 in NFW was added to the reaction.

## **2.5. Repeatability, inter-operator and inter-platform reproducibility**

Repeatability and inter-operator reproducibility for the RNA RT-LAMP and Direct RT-LAMP were measured by running eight replicates of samples with three different operators. Inter-platform

reproducibility was measured by running eight replicates of the samples across two Genie® platforms. For RNA RT-LAMP, operators used the same RNA extraction for each sample; for Direct RT-LAMP operators used the same 1 in 20 dilution of a combined swab sample in NFW.

## 2.6. Statistical analysis

DSe, DSp, positive and negative likelihood ratios (LR) including 95% confidence intervals (CI), and the Cohen's Kappa statistic ( $\kappa$ )<sup>17</sup> were determined using contingency tables in R 3.6.1<sup>18</sup>. Assessment of the diagnostic performance was made under three scenarios: 1) "No  $C_T$  cut off" (low-to-high viral load), 2) " $C_T$  cut off  $\leq 33$ " (moderate-to-high viral load) and 3)  $C_T$  cut off  $\leq 25$  (high viral load and significant risk of shedding).

To further explore the practical application of the RT-LAMP assay in clinical practice, we estimated a patient's probability of being infected under different clinical scenarios where Direct RT-LAMP could be applied. Final diagnosis in these scenarios is given by linking the patient's pre-test probability of infection ( $P_{pre}$ ) with the Direct RT-LAMP's LRs to estimate the post-test probability of infection ( $P_{post}$ ). To estimate these pre- and post-test probabilities of infection a scenario-tree model was used<sup>19</sup> which allowed estimation of risk-based probability estimates for scenarios where patients are: 1) symptomatic and have had no contact with a suspected or confirmed SARS-CoV-2 infected individual (risk contact), 2) Symptomatic and have had risk contact(s), 3) asymptomatic with no risk contact(s) and 4) symptomatic and have had risk contact(s). A detailed explanation of the model and parameters used is provided as supplementary material. This model was built in Excel using the add-in software Poptools<sup>20</sup> (Supplementary information).

### 3. Results

#### 3.1. Analytical sensitivity

Using a synthetic DNA template titrated in NFW, the RNA-RT-LAMP and Direct-RT-LAMP assays were able to detect  $1 \times 10^1$  copies each, in one of two duplicates (detection limit between  $1 \times 10^1$  and  $1 \times 10^2$  copies) (Table 2). To compare the ASe of the RNA RT-LAMP with the rRT-PCR assay a 10-fold decimal dilution series of SARS-CoV-2 RNA extracted from a virus infected tissue culture media was used. The RT-LAMP detected to a dilution of  $10^{-3}$ , equivalent to a rRT-PCR  $C_T$  value of 36.0 (Table 1). In the case of RNA RT-LAMP the dilution with a corresponding rRT-PCR  $C_T \leq 30$  was detected in duplicate and  $C_T \geq 30$  and  $\leq 39$  were detected in one of the duplicates (Table 3).

To compare the analytical sensitivity of the Direct RT-LAMP to the rRT-PCR assay a 2-fold decimal dilution series of SARS-CoV-2 positive VTM from a combined swab was used. The Direct RT-LAMP detected dilutions spanning 1:8 to 1:512, equivalent to a rRT-PCR  $C_T$  value of 22.65 (Table 3). This would equate to between 5 - 6  $\log_{10}$  digital copies (dC)/ml. The rRT-PCR detected dilutions spanning 1:8 to 1:2048 (Table 4).

#### 3.2. Performance of RNA RT-LAMP

The performance of the RT-LAMP on extracted RNA was determined using 196 individual clinical samples tested in duplicate and compared to the results of the rRT-PCR (tested in single) (Figure 1). All samples with a  $C_T \leq 30$  were detected within 16 minutes. The overall DSe was calculated as 97% (95% CI: 90 - 99) and the overall DSp was 99% (95 - 1.00) (Table 5A) (positive likelihood ratio: 103.39 [14.69 – 727.57]; negative likelihood ratio: 0.03 [0.01 – 0.10]), indicating almost perfect agreement between the two assays.

By employing a rRT-PCR cut-off of  $\leq C_T 33$  the RNA RT-LAMP had a DSe of 100% (95% CI: 95 - 1.00) and a DSp of 99% [95% CI: 95 - 1.00] (positive likelihood ratio: 107 [95% CI: 15.21 – 752.66]; negative

likelihood ratio: 0.00 [0.00 – 0.03]), indicating almost perfect agreement between the two assays (Table 5B). By employing a rRT-PCR cut-off of  $\leq C_T$  25 the RNA RT-LAMP had a DSe of 100% [95% CI: 0.90 - 1.00] and a DSp of 99% [95% CI: 0.95 - 1.00] (positive likelihood ratio: 107.00% [95% CI: 15.21 – 752.66]; negative likelihood ratio: 0.00% [0.00 – 0.05]), indicating almost perfect agreement between the two assays (Table 5C).

### 3.3. Performance of Direct-RT-LAMP

To perform RT-LAMP directly from the swab VTM a series of dilutions were evaluated comprising 1:5, 1:10, 1:20 and 1:40 in NFW. The optimal dilution whereby inhibition was limited, but  $T_p$  was maximised was determined to be 1:20 (data not shown). The DSe and DSp of the Direct-RT-LAMP assay was determined using 119 individual clinical samples diluted at 1 in 20 in NFW and compared to the results of the rRT-PCR (tested in single) (Figure 2). All samples with a  $C_T \leq 30$  were detected within 14 minutes.

The overall DSe of Direct-RT-LAMP was 67% [95% CI: 52-80] and the overall DSp was 97% [95% CI: 90-1.00], positive likelihood ratio: 23.57% [95% CI: 5.93 – 93.68], negative likelihood ratio: 0.34 [95% CI: 0.22 – 0.50], with substantial agreement between the two assays (Table 6A).

The DSe when a rRT-PCR  $C_T$  value cut-off of  $\leq 33$  or  $\leq 25$  was utilized, increased to 75% [95% CI: 60 - 87] and 100% [95% CI: 86 - 1.0] respectively (Table 6B and 6C). Positive likelihood ratios were 26.25 [95% CI: 6.63 – 103.98] and 35 [95% CI: 8.93 – 137.18], respectively, and negative likelihood ratio were 0.26 [95% CI: 0.15 – 0.43] and 0.00 [95% CI: 0.00 – 0.08] respectively. There was substantial agreement using a  $C_T$  cut off  $\leq 33$  and almost perfect agreement using a  $C_T$  cut off  $\leq 25$ . When the ASe was determined independently from the DSe using a dilution series of SARS-CoV-2 patient swab VTM, it was noted that a  $C_T$  value of 24.15 and 24.80 were not detected by Direct RT-LAMP. This is in contrast to the results from the DSe evaluation when these range of  $C_T$  were detected. A  $C_T$  of 24 directly from VTM is not necessarily comparable to a  $C_T$  of 24 derived from a serially diluted swab

sample and this likely reflects the difference observed. Using a standard curve to measure genome copies was performed for DSe, but it was used for ASe.

The incorporation of subsequent confirmatory rRT-PCR testing to verify a negative Direct RT-LAMP result increased the overall DSe of this pipeline to 99%, with a DSp of 98.4%. ASe was determined using a panel of respiratory pathogens for Direct-RT-LAMP. No cross reactivity was observed, including against four seasonal coronaviruses.

A selection of paired ONSwab and saliva samples were compared to evaluate saliva as a potential diagnostic matrix for SARS-CoV-2 detection (Table 7). The ONSwab samples ranged in  $C_T$ 's from 18:56 to 35.81 when the rRT-PCR was performed on neat VTM and ranged in  $T_p$  from 06:09-11:36 minutes. Direct RT-LAMP detected SARS-CoV-2 in all samples ( $n=4$ ) with a  $C_T \leq 25$ . Direct RT-LAMP did not detect SARS-CoV-2 in ONSwab VTM with a  $C_T \geq 25$  ( $n=4$ ). SARS-CoV-2 was detected in only two of the paired saliva swabs in all dilutions (1:5, 1:10, 1:20) for one sample and in two dilutions (1:5 and 1:10) for the other sample. All four rRT-PCR negative samples were negative by Direct RT-LAMP both in the ONSwabs and in the saliva samples.

### **3.4. Repeatability, inter-operator and inter-platform reproducibility**

When it comes to repeatability and inter-operator reproducibility, 100% of the replicates were detected for each sample by the three operators. The percentage coefficient of variation (%CV) was below 10 both when comparing within and between operators (Table 8). When comparing between platforms, 100% of the replicates were detected on both the Genie® HT and Genie® III, with the %CV below 10 (Table 9).

### **3.6 Linking pre- and post-test probability of infection**

The practical application of using Direct RT-LAMP during the growing phase of an epidemic where the prevalence of infection is around 0.14 (14%) (Supplementary Information 1) was modelled. In

practice a clinical team will assess patients who have clinical signs (symptomatic) or not (asymptomatic) and those that have either had contact or not with sick or infected individuals (risk contact). These patients all have different risks and therefore different pre-test probabilities of being infected (Figure 3). Pre- and post-test probabilities of infection are presented for different risk categories of patients and different risk categories of viral shedding levels (no  $C_T$  cut off,  $C_T \leq 33$ ,  $C_T \leq 25$ ) (Figure 3). For example, consider a symptomatic patient who had no risk contact. As shown in Figure 3, the pre-test probability that they are infected is on average 0.19 (19%), after testing positive in the Direct RT-LAMP test, the (post-test) probability of this patient being infected increased to 0.81 (81%). On the other hand, if the Direct RT-LAMP result was negative the probability of the patient being infected decreases to 0.07 (7%). Assuming this probability is considered too high, the clinical team would recommend isolation until confirmatory diagnosis is obtained.

Consider now an asymptomatic patient with a confirmed contact awaiting a test result. The pre-test probability of this patient is 0.12 (12%), after a negative Direct RT-LAMP result the post-test probability of this patient being infected is 0.05 (5%). The clinical team, before sending the sample for confirmatory testing, may look at the post-test probability of this patient shedding moderate to high levels of virus if they were infected ( $C_T \leq 33$ ,  $C_T \leq 25$ ). These probabilities are lower than 0.05 (5%) (Figure 3) so the clinical team may consider these probabilities low and infer that the patient does not represent a risk for spreading infection, and diagnose the patient as “not infected”. These kinds of decisions may be necessary when there are limited diagnostic resources available.

#### **4. Discussion**

This study describes the development and validation of a rapid, accurate and versatile SARS-CoV-2 RT-LAMP assay. This assay demonstrates excellent concordance with rRT-PCR when performed on extracted RNA and when used directly on diluted VTM can detect samples with a high viral load

which would be considered significant for viral transmission<sup>21</sup>. No cross reactivity was observed against common respiratory pathogens including seasonal coronaviruses.

The overall DSe of the RNA RT-LAMP assay was calculated as 97% and the overall DSp was 99% with all samples of  $C_T \leq 30$  detected within 16 minutes. We therefore recommend that when using RNA RT-LAMP, the length of the assay should be a maximum of 16 minutes to avoid detection of degraded nucleic acid which may be derived from the clinical sample or the environment<sup>22</sup>.

A shortage in the supply of RNA extraction reagents was a critical rate-limiting step affecting COVID-19 diagnostic capacity, thus the ability to bypass this step and test directly from swab has significant advantages. Various simple sample preparation methods have been reported which can circumvent RNA extraction, including the use of syringe filtration, Chelex<sup>TM</sup> 100, dilution in NFW, or a heat step, among other<sup>23–26</sup>. In this study the best performance for Direct RT-LAMP was achieved using a 1:20 dilution of VTM in NFW. This sample preparation method is simple and quick to perform (<5 mins) and does not require any additional equipment, therefore it is well-suited for near-patient testing.

Recent publications have demonstrated that there is a strong correlation between rRT-PCR  $C_T$  values and the ability to recover live virus, and therefore it is unlikely that patients providing samples with high  $C_T$  values pose a high risk of transmission<sup>21</sup>. One previous study demonstrated that live virus could only be recovered reliably from samples with a  $C_T$  between 13 to 17, when using a rRT-PCR targeting the *E* gene<sup>21</sup>. Additionally, the ability to recover live virus then dropped progressively with virus unrecoverable from samples with a  $C_T$  above 33<sup>21</sup>. Bullard and colleagues<sup>27</sup> found no virus was recoverable from clinical samples taken from symptomatic patients with rRT-PCR (targeting the *E*-gene)  $C_T$  values of >24. In the same study<sup>27</sup> each unit increase in  $C_T$  value corresponded to a 32% decrease in the odds of recoverable live virus. Consequently, as the risk of SARS-CoV-2 transmission is still not fully understood, a range of  $C_T$  cut-off values were set in our study, to understand in particular the performance of the Direct-RT-LAMP assay at different viral loads. The overall DSe of

Direct RT-LAMP was 67%, however, when setting  $C_T$  cut-offs of  $\leq 33$  (low-medium viral load) and  $\leq 25$  (high viral load and significant risk of shedding) the Direct RT-LAMP DSe increased to 75% and 100%, respectively. DSp was unchanged and remained at 97%. As no samples were detected beyond 14 minutes, we recommend that when using Direct RT-LAMP the length of the assay should be a maximum of 14 minutes to avoid detection of degraded nucleic acid which may be derived from the clinical sample or environment<sup>22</sup>.

The ability to detect patients with high viral load ( $C_T \leq 25$ ) directly from diluted swabs, demonstrates significant potential for the use of Direct RT-LAMP for the rapid diagnosis of symptomatic patients and also for rapid screening of asymptomatic individuals. This is largely supported by studies reporting similar viral loads in asymptomatic and symptomatic patient groups<sup>28-31</sup>, albeit not universally<sup>32,33</sup>. As with any diagnostic test, when it comes to the clinical application of Direct RT-LAMP, the pre-test probability of infection, based on clinical context and disease prevalence in the test subject or population, must be considered together with limitations of assay performance. We have provided a model, utilising published data on disease transmission from elsewhere, to illustrate the impact of pre-test probability on the positive predictive value (PPV) and negative predictive value (NPV) of Direct RT-LAMP in different scenarios. Depending on factors such as assay function (diagnosis vs screening), disease prevalence, patient group, setting and available resources, and their impact on PPV and NPV, further confirmation by a negative verification step may be considered desirable. It should be noted that the estimates of pre- and post-test probabilities of infection in this study were made only as an example of, and to help understand the use of the Direct RT-LAMP in practice. These estimates were based on crude approximations of the model's parameter values (Supplementary information) and we encourage the readers who would like to use this model, to adjust the model and use parameter values that best suits the epidemiological situation of the country/region where the test would be applied.

Rapid testing of symptomatic SARS-CoV-2 positive patients within healthcare facilities allows their rapid isolation or cohorting, significantly reducing onward transmission and improving bed management and patient flow. Additionally, screening of asymptomatic patient groups or at the community level may enable the rapid identification of those with high viral loads who may pose a high risk of onward transmission. This would allow for swift public health intervention with instruction to self-isolate/ quarantine and the rapid tracking and tracing of their contacts - essential in screening programmes aiming to reduce the reproductive number ( $R_0$ ) and spread of the disease in a community.

Direct RT-LAMP offers speed, robustness and portability making it attractive as an option for near-patient testing outside the conventional clinical laboratory, subject to the necessary risk-assessments to ensure safety of the operator<sup>34</sup>. Within HHFT we are exploring its application in settings such as: a multi-disciplinary non-specialist laboratory; the emergency department; primary care and nursing/ care home settings.

In this study, clinical validation of the RT-LAMP assay took place in March, April and May 2020, largely during a period of high local COVID-19 prevalence (around 40% positivity of samples submitted) and on samples from largely symptomatic patients and hospital staff. It is possible that RT-LAMP assay performance on samples from asymptomatic subjects may vary dependent on the level of detectable RNA (as a surrogate of live viral shedding) in this different patient group. Additionally, the RT-LAMP assay was validated using ONSwabs in VTM. Assay performance on a limited number of salivary samples was also explored. This preliminary analysis suggests that saliva may not be as suitable when compared to ONSwabs as the detection of SARS-CoV-2 both by rRT-PCR and Direct RT-LAMP was poorer using saliva samples. More work is required to understand if this is due to degradation of the RNA within the sample (e.g. salivary enzymes), or inhibition due to the complex nature of this matrix. Assay performance was not evaluated on lower respiratory tract

samples or non-respiratory tract samples, and therefore future research may aim to determine the performance of both the RNA- and Direct-RT-LAMP assays using these various sample types.

In our experience, during the diagnostic response to this current pandemic caused by a novel emergent pathogen (SARS-CoV-2), diversity in diagnostic platforms and routes to deliver a result based on the ability and agility to switch between methodologies has been key to allowing delivery of a resilient and sustainable diagnostic service. Factors such as: analyser availability; staff-skill mix; dynamic changes in patient groups tested or disease prevalence; and particularly in the UK; consumable and reagent supply, have highlighted the need for diagnostic services to have adaptability and capability to explore novel and alternative techniques.

#### **Ethical approval**

No ethical approval was required for this service improvement study.

## **5. Acknowledgements**

We would like to thank the clinical teams and Helen Denman the Microbiology Laboratory manager at Hampshire Hospitals NHS Foundation Trust.

## 6. References

- 1 WHO. Pneumonia of unknown cause. Available at <https://www.who.int/csr/don/05-january-2020-pneumonia-of-unkown-cause-china/en/> 2020.
- 2 Zhu Na, Zhang Dingyu, Wang Wenling, Li Xingwang, Yang Bo, Song Jingdong, et al. A novel coronavirus from patients with pneumonia in China, 2019. *N Engl J Med* 2020;**382**(8):727–33. Doi: 10.1056/NEJMoa2001017.
- 3 Gorbalenya Alexander E, Baker Susan C, Baric Ralph S, Groot Raoul J De, Gulyaeva Anastasia A, Haagmans Bart L, et al. The species and its viruses – a statement of the Coronavirus Study Group. *Biorxiv (Cold Spring Harb Lab* 2020:1–15. Doi: 10.1101/2020.02.07.937862.
- 4 Corman Victor M., Landt Olfert, Kaiser Marco, Molenkamp Richard, Meijer Adam, Chu Daniel Kw, et al. Detection of 2019 novel coronavirus (2019-nCoV) by real-time RT-PCR. *Euro Surveill* 2020;**25**(3). Doi: 10.2807/1560-7917.ES.2020.25.3.2000045.
- 5 Tsugunori Notomi, Okayama Hiroto, Masubuchi Harumi, Yonekawa Toshihiro, Watanabe Keiko, Amino Nobuyuki, et al. Loop-mediated isothermal amplification of DNA. *Nucleic Acids Res* 2000;**28**(12):63.
- 6 Keikha Masoud. *LAMP Method as One of the Best Candidates for Replacing with PCR Method*. vol. 25. n.d.
- 7 Wong Y. P., Othman S., Lau Y. L., Radu S., Chee H. Y. Loop-mediated isothermal amplification (LAMP): a versatile technique for detection of micro-organisms. *J Appl Microbiol* 2018:626–43. Doi: 10.1111/jam.13647.
- 8 Howson Emma L.A., Kurosaki Yohei, Yasuda Jiro, Takahashi Masayoshi, Goto Hiroaki, Gray Ashley R., et al. Defining the relative performance of isothermal assays that can be used for rapid and sensitive detection of foot-and-mouth disease virus. *J Virol Methods* 2017;**249**(July):102–10. Doi: 10.1016/j.jviromet.2017.08.013.
- 9 Waters Ryan A., Fowler Veronica L., Armson Bryony, Nelson Noel, Gloster John, Paton David J., et al. Preliminary validation of direct detection of foot-and-mouth disease virus within clinical samples using reverse transcription Loop-mediated isothermal amplification coupled with a simple lateral flow device for detection. *PLoS One* 2014;**9**(8). Doi: 10.1371/journal.pone.0105630.
- 10 Fowler Veronica L., Howson Emma L.A., Madi Mikidache, Mioulet Valérie, Caiusi Chiara, Pauszek Steven J., et al. Development of a reverse transcription loop-mediated isothermal amplification assay for the detection of vesicular stomatitis New Jersey virus: Use of rapid molecular assays to differentiate between vesicular disease viruses. *J Virol Methods* 2016;**234**:123–31. Doi: 10.1016/j.jviromet.2016.04.012.
- 11 Armson Bryony, Walsh Charlotte, Morant Nick, Fowler Veronica L, Knowles Nick J., Clark

- Duncan. The development of two field-ready reverse transcription loop-mediated isothermal amplification assays for the rapid detection of Seneca Valley virus 1. *Transbound Emerg Dis* 2019;**66**(1):497–504. Doi: 10.1111/tbed.13051.
- 12 Faria Nuno Rodrigues, Sabino Ester C., Nunes Marcio R.T., Alcantara Luiz Carlos Junior, Loman Nicholas J., Pybus Oliver G. Mobile real-time surveillance of Zika virus in Brazil. *Genome Med* 2016;**8**(1):2–5. Doi: 10.1186/s13073-016-0356-2.
  - 13 Mahony James, Chong Sylvia, Bulir David, Ruyter Alexandra, Mwawasi Ken, Waltho Daniel. Multiplex loop-mediated isothermal amplification (M-LAMP) assay for the detection of influenza A/H1, A/H3 and influenza B can provide a specimen-to-result diagnosis in 40min with single genome copy sensitivity. *J Clin Virol* 2013;**58**(1):127–31. Doi: <https://doi.org/10.1016/j.jcv.2013.06.006>.
  - 14 Abbasi Ibrahim, Kirstein Oscar D., Hailu Asrat, Warburg Alon. Optimization of loop-mediated isothermal amplification (LAMP) assays for the detection of Leishmania DNA in human blood samples. *Acta Trop* 2016;**162**:20–6. Doi: 10.1016/j.actatropica.2016.06.009.
  - 15 de Paz Héctor David, Brotons Pedro, Esteva Cristina, Muñoz-Almagro Carmen. Validation of a Loop-Mediated Isothermal Amplification Assay for Rapid Diagnosis of Invasive Pneumococcal Disease. *Front Cell Infect Microbiol* 2020;**10**. Doi: 10.3389/fcimb.2020.00115.
  - 16 Sudhaharan Sukanya, Vanjari Lavanya, Mamidi Neeraja, Ede Nagapriyanka, Vemu Lakshmi. Evaluation of LAMP assay using phenotypic tests and conventional PCR for detection of nuc and mecA genes among clinical isolates of staphylococcus SPP. *J Clin Diagnostic Res* 2015;**9**(8):DC06–9. Doi: 10.7860/JCDR/2015/13962.6315.
  - 17 Landis J Richard, Koch Gary G. The Measurement of Observer Agreement for Categorical Data. *Biometrics* 1977;**33**(1):159–74. Doi: 10.2307/2529310.
  - 18 Team R Development Core. R: A Language and Environment for Statistical Computing 2009.
  - 19 Martin P A J, Cameron A R, Greiner M. Demonstrating freedom from disease using multiple complex data sources 1: a new methodology based on scenario trees. *Prev Vet Med* 2007;**79**(2–4):71–97. Doi: 10.1016/j.prevetmed.2006.09.008.
  - 20 M Hood G. PopTools version 3.2.5 2011.
  - 21 La Scola Bernard, Le Bideau Marion, Andreani Julien, Hoang Van Thuan, Grimaldier Clio, Colson Philippe, et al. Viral RNA load as determined by cell culture as a management tool for discharge of SARS-CoV-2 patients from infectious disease wards. *Eur J Clin Microbiol Infect Dis* 2020;**39**(6):1059–61. Doi: 10.1007/s10096-020-03913-9.
  - 22 Zhou Authors Jie, Otter Jonathan A, Price James R, Cimpeanu Cristina, Garcia Meno, Kinross James, et al. Investigating SARS-CoV-2 surface and air contamination in an acute healthcare setting during the peak of the COVID-19 pandemic in London. *MedRxiv Prepr Doi* 2020:1–24.
  - 23 Howson E. L. A., Armson B., Lyons N. A., Chepkwony E., Kasanga C. J., Kandusi S., et al. Direct

- detection and characterization of foot-and-mouth disease virus in East Africa using a field-ready real-time PCR platform. *Transbound Emerg Dis* 2018;**65**(1):221–31. Doi: 10.1111/tbed.12684.
- 24 Walsh P. Sean, Metzger David A., Higuchi Russell. Biotechniques 30th anniversary gem Chelex 100 as a medium for simple extraction of DNA for PCR-based typing from forensic material. *Biotechniques* 2013;**54**(3):506–13.
  - 25 Modak Sayli S., Barber Cheryl A., Geva Eran, Abrams William R., Malamud Daniel, Ongagna Yhombi Serge Yvon. Rapid Point-of-Care Isothermal Amplification Assay for the Detection of Malaria without Nucleic Acid Purification. *Infect Dis Res Treat* 2016;**9**:IDRT.S32162. Doi: 10.4137/idrt.s32162.
  - 26 Suzuki Ryota, Ihira Masaru, Enomoto Yoshihiko, Yano Hiroaki, Maruyama Fumio, Emi Nobuhiko, et al. Heat denaturation increases the sensitivity of the cytomegalovirus loop-mediated isothermal amplification method. *Microbiol Immunol* 2010;**54**(8):466–70. Doi: 10.1111/j.1348-0421.2010.00236.x.
  - 27 Jared Bullard, Kerry Dust, Duane Funk, James E. Strong, David Alexander, Lauren Garnett, Carl Boodman, Alexander Bello, Adam Hedley, Zachary Schiffman, Kaylie Doan, , Nathalie Bastien, Yan Li Paul G. Van Caeseele and Guillaume Poliquin. Predicting infectious SARS-CoV-2 from diagnostic samples. *Clin Infect Dis* 2020. Doi: 10.1093/cid/ciaa638.
  - 28 Lavezzo Enrico, Franchin Elisa, Ciavarella Constanze, Cuomo-Dannenburg Gina, Barzon Luisa, Vecchio Claudia Del, et al. Suppression of COVID-19 outbreak in the municipality of Vo, Italy. *MedRxiv* 2020:2020.04.17.20053157. Doi: 10.1101/2020.04.17.20053157.
  - 29 Kimball Anne, Hatfield Kelly M., Arons Melissa, James Allison, Taylor Joanne, Spicer Kevin, et al. Asymptomatic and presymptomatic SARS-COV-2 infections in residents of a long-term care skilled nursing facility - King County, Washington, March 2020. *Morb Mortal Wkly Rep* 2020:377–81. Doi: 10.15585/MMWR.MM6913E1.
  - 30 Arons M. M., Hatfield K. M., Reddy S. C., Kimball A., James A., Jacobs J. R., et al. Presymptomatic SARS-CoV-2 infections and transmission in a skilled nursing facility. *N Engl J Med* 2020;**382**(22):2081–90. Doi: 10.1056/NEJMoa2008457.
  - 31 Cereda D, Tirani M, Rovida F, Demicheli V, Ajelli M, Poletti P, et al. The early phase of the COVID-19 outbreak in Lombardy, Italy 2020.
  - 32 Zhou Rui, Li Furong, Chen Fengjuan, Liu Huamin, Zheng Jiazhen, Lei Chunliang, et al. Viral dynamics in asymptomatic patients with COVID-19. *Int J Infect Dis* 2020;**96**:288–90. Doi: 10.1016/j.ijid.2020.05.030.
  - 33 Chau Nguyen Van Vinh, Thanh Lam Vo, Thanh Dung Nguyen, Yen Lam Minh, Minh Ngo Ngoc Quang, Hung Le Manh, et al. The natural history and transmission potential of asymptomatic SARS-CoV-2 infection. *Clin Infect Dis* 2020. Doi: 10.1093/cid/ciaa711.

- 34 PHE. COVID-19: safe handling and processing for samples in laboratories. Available at <https://www.gov.uk/government/publications/wuhan-novel-coronavirus-guidance-for-clinical-diagnostic-laboratories/wuhan-novel-coronavirus-handling-and-processing-of-laboratory-specimens#risk-assessment>. Accessed 19 June 2020, 2020.
- 35 Fagan T J. Letter: Nomogram for Bayes theorem. *N Engl J Med* 1975;**293**(5):257. Doi: 10.1056/NEJM197507312930513.
- 36 Nishiura Hiroshi, Kobayashi Tetsuro, Miyama Takeshi, Suzuki Ayako, Jung Sung-Mok, Hayashi Katsuma, et al. Estimation of the asymptomatic ratio of novel coronavirus infections (COVID-19). *Int J Infect Dis IJID Off Publ Int Soc Infect Dis* 2020:154–5. Doi: 10.1016/j.ijid.2020.03.020.

**Table 1:** Analytical specificity versus a panel of respiratory and meningitis/encephalitis pathogens

| <b>Respiratory Pathogen</b>             |
|-----------------------------------------|
| Coronavirus OC43                        |
| Adenovirus 31                           |
| Parainfluenza 4                         |
| Influenza B                             |
| Influenza AH3                           |
| Parainfluenza 3                         |
| Rhinovirus 1A                           |
| Coronavirus 229E                        |
| Parainfluenza 2                         |
| Adenovirus 1                            |
| Coronavirus NL63                        |
| Respiratory syncytial virus A2          |
| Influenza AH1N1                         |
| Parainfluenza 1                         |
| M Pneumoniae                            |
| Adenovirus 3                            |
| <i>Bordetella pertussis</i>             |
| <i>Chlamydia pneumoniae</i>             |
| <i>Bordetella parapertussis</i>         |
| Coronavirus HKU1                        |
| Human metapneumovirus 8                 |
| <b>Meningitis/Encephalitis Pathogen</b> |
| <i>Neisseria meningitidis</i>           |
| <i>Streptococcus agalactiae</i>         |
| <i>Haemophilus influenzae</i>           |
| Herpes simplex virus 2                  |
| <i>Listeria monocytogenes</i>           |
| <i>Parechovirus type 3</i>              |
| Varicella zoster virus                  |

**Table 2** Analytical sensitivity (ASe) of RNA and Direct RT-LAMP using a synthetic DNA template

| Template copy number | RNA RT-LAMP (Tp) |             | Direct RT-LAMP (Tp) |             |
|----------------------|------------------|-------------|---------------------|-------------|
|                      | Replicate 1      | Replicate 2 | Replicate 1         | Replicate 2 |
| 1x10 <sup>7</sup>    | 03:32            | 03:31       | 03:46               | 03:45       |
| 1x10 <sup>6</sup>    | 04:14            | 04:15       | 04:29               | 04:30       |
| 1x10 <sup>5</sup>    | 04:49            | 04:49       | 05:03               | 05:00       |
| 1x10 <sup>4</sup>    | 05:31            | 05:31       | 05:40               | 05:41       |
| 1x10 <sup>3</sup>    | 06:30            | 06:48       | 06:58               | 07:12       |
| 1x10 <sup>2</sup>    | 09:37            | 08:50       | 07:36               | 10:20       |
| 1x10 <sup>1</sup>    | 12:53            | Negative    | 10:32               | Negative    |
| NTC                  | Negative         | Negative    | Negative            | Negative    |

Tp: Time to positivity in minutes and seconds (mm:ss); NTC: no template control.

**Table 3.** Analytical sensitivity (ASe) of RNA RT-LAMP

| Decimal 10-fold dilution | rRT-PCR (C <sub>T</sub> ) | RNA RT-LAMP (Tp) |             |
|--------------------------|---------------------------|------------------|-------------|
|                          |                           | Replicate 1      | Replicate 2 |
| Neat                     | 27.5                      | 08:03            | 08:32       |
| 10 <sup>-1</sup>         | 30.0                      | 10:44            | 11:45       |
| 10 <sup>-2</sup>         | 33.0                      | 13:03            | Negative    |
| 10 <sup>-3</sup>         | 36.0                      | 14:29            | Negative    |
| 10 <sup>-4</sup>         | 39.0                      | Negative         | Negative    |

C<sub>T</sub>: Cycle Threshold; Tp: Time to positivity in minutes and seconds (mm:ss).

**Table 4.** Analytical sensitivity (ASe) of Direct RT-LAMP

| Decimal 2-fold dilution | rRT-PCR (C <sub>T</sub> ) | Direct RT-LAMP (Tp) |             |             |
|-------------------------|---------------------------|---------------------|-------------|-------------|
|                         |                           | Replicate 1         | Replicate 2 | Replicate 3 |
| 1:8                     | 16.55                     | 06:47               | 06:25       | 06:25       |
| 1:16                    | 17.31                     | 07:02               | 06:38       | 06:37       |
| 1:32                    | 17.80                     | 07:22               | 07:03       | 07:09       |
| 1:64                    | 19.04                     | 07:41               | 07:53       | 07:38       |
| 1:128                   | 20.03                     | 08:26               | 08:42       | 09:49       |
| 1:256                   | 21.73                     | 08:38               | 09:18       | 09:41       |
| 1:512                   | 22.65                     | 09:30               | 10:02       | Negative    |
| 1:1024                  | 24.15                     | Negative            | Negative    | Negative    |
| 1:2048                  | 24.80                     | Negative            | Negative    | Negative    |

C<sub>T</sub>: Cycle Threshold; Tp: Time to positivity in minutes and seconds (mm:ss)

**Table 5.** Overall diagnostic sensitivity (DSe) and specificity (DSp) of the RNA RT-LAMP with all rRT-PCR  $C_T$  values considered (A), and with a  $C_T$  value cut-off of  $\leq 33$  (B) and  $\leq 25$  (C).

|                    |          | <b>rRT-PCR (no <math>C_T</math> cut-off, 45 cycles)</b>           |          |       |
|--------------------|----------|-------------------------------------------------------------------|----------|-------|
| <b>(A)</b>         |          | Positive                                                          | Negative | Total |
| <b>RNA-RT-LAMP</b> | Positive | 86                                                                | 1        | 87    |
|                    | Negative | 3                                                                 | 106      | 109   |
|                    | Total    | 89                                                                | 107      | 196   |
|                    |          | DSe = 97%, DSp = 99%, K = 0.96                                    |          |       |
|                    |          | <b>rRT-PCR (<math>C_T</math> cut-off of <math>\leq 33</math>)</b> |          |       |
| <b>(B)</b>         |          | Positive                                                          | Negative | Total |
| <b>RNA-RT-LAMP</b> | Positive | 78                                                                | 1        | 79    |
|                    | Negative | 0                                                                 | 106      | 106   |
|                    | Total    | 78                                                                | 107      | 185   |
|                    |          | DSe = 100%, DSp = 99%, K = 0.99                                   |          |       |
|                    |          | <b>rRT-PCR (<math>C_T</math> cut-off of <math>\leq 25</math>)</b> |          |       |
| <b>(C)</b>         |          | Positive                                                          | Negative | Total |
| <b>RNA-RT-LAMP</b> | Positive | 36                                                                | 1        | 37    |
|                    | Negative | 0                                                                 | 106      | 106   |
|                    | Total    | 36                                                                | 107      | 143   |
|                    |          | DSe = 100%, DSp = 99%, K = 0.99                                   |          |       |

A positive RNA RT-LAMP result is indicated by a Tp of <20 minutes with the correct anneal, for at least one duplicate.

**Table 6.** Overall diagnostic sensitivity (DSe) and specificity (DSp) of the Direct-RT-LAMP with all rRT-PCR  $C_T$  values considered (A), and with a  $C_T$  value cut-off of  $\leq 33$  (B) and  $\leq 25$  (C).

|                         |          | <b>rRT-PCR (no <math>C_T</math> cut-off, 45 cycles)</b>           |          |       |
|-------------------------|----------|-------------------------------------------------------------------|----------|-------|
| <b>(A)</b>              |          | Positive                                                          | Negative | Total |
| <b>Direct-RT-LAMP</b>   | Positive | 33                                                                | 2        | 35    |
|                         | Negative | 16                                                                | 68       | 84    |
|                         | Total    | 49                                                                | 70       | 119   |
|                         |          | DSe = 67%, DSp = 97%, K = 0.67                                    |          |       |
|                         |          | <b>rRT-PCR (<math>C_T</math> cut-off of <math>\leq 33</math>)</b> |          |       |
| <b>(B)</b>              |          | Positive                                                          | Negative | Total |
| <b>Direct - RT-LAMP</b> | Positive | 33                                                                | 2        | 35    |
|                         | Negative | 11                                                                | 68       | 79    |
|                         | Total    | 44                                                                | 70       | 114   |
|                         |          | DSe = 75%, DSp = 97%, K = 0.75                                    |          |       |
|                         |          | <b>rRT-PCR (<math>C_T</math> cut-off of <math>\leq 25</math>)</b> |          |       |
| <b>(C)</b>              |          | Positive                                                          | Negative | Total |
| <b>Direct-RT-LAMP</b>   | Positive | 25                                                                | 2        | 27    |
|                         | Negative | 0                                                                 | 68       | 68    |
|                         | Total    | 25                                                                | 70       | 95    |
|                         |          | DSe = 100%, DSp = 97%, K = 0.95                                   |          |       |

A positive Direct RT-LAMP result is indicated by a Tp of <20 minutes with the correct anneal, for at least one duplicate.

**Table 7.** Comparison between swab and saliva detection of SARS-CoV-2 using Direct RT-LAMP

| Sample | C <sub>T</sub> from neat ONSwab | Tp 1:20 ONSwab | C <sub>T</sub> from 1:20 Saliva | Tp 1:5 Saliva | Tp 1:10 Saliva | Tp 1:20 Saliva |
|--------|---------------------------------|----------------|---------------------------------|---------------|----------------|----------------|
| 1      | 35.81                           | Negative       | Negative                        | Negative      | Negative       | Negative       |
|        |                                 | Negative       |                                 | Negative      | Negative       | Negative       |
| 2      | 17.44                           | 06:14          | 30.36                           | Negative      | Negative       | Negative       |
|        |                                 | 06:09          |                                 | 11:48         | 10:55          | Negative       |
| 3      | 28.97                           | Negative       | 31.94                           | Negative      | Negative       | Negative       |
|        |                                 | Negative       |                                 | Negative      | Negative       | Negative       |
| 4      | 34.46                           | Negative       | 31.04                           | Negative      | Negative       | Negative       |
|        |                                 | Negative       |                                 | Negative      | Negative       | Negative       |
| 5      | 24.26                           | 10:52          | 24.91                           | Negative      | Negative       | Negative       |
|        |                                 | 11:36          |                                 | Negative      | Negative       | Negative       |
| 6      | 18.97                           | 06:31          | 25.17                           | 07:48         | 08:07          | 07:30          |
|        |                                 | 06:26          |                                 | 08:00         | 09:18          | 08:53          |
| 7      | 18.56                           | 06:23          | 31.74                           | Negative      | Negative       | Negative       |
|        |                                 | 06:32          |                                 | Negative      | Negative       | Negative       |
| 8      | 32.46                           | Negative       | Negative                        | Negative      | Negative       | Negative       |
|        |                                 | Negative       |                                 | Negative      | Negative       | Negative       |
| 9      | Negative                        | Negative       | Negative                        | Negative      | Negative       | Negative       |
|        |                                 | Negative       |                                 | Negative      | Negative       | Negative       |
| 10     | Negative                        | Negative       | Negative                        | Negative      | Negative       | Negative       |
|        |                                 | Negative       |                                 | Negative      | Negative       | Negative       |
| 11     | Negative                        | Negative       | Negative                        | Negative      | Negative       | Negative       |
|        |                                 | Negative       |                                 | Negative      | Negative       | Negative       |
| 12     | Negative                        | Negative       | Negative                        | Negative      | Negative       | Negative       |
|        |                                 | Negative       |                                 | Negative      | Negative       | Negative       |
| 13     | Negative                        | Negative       | Negative                        | Negative      | Negative       | Negative       |
|        |                                 | Negative       |                                 | Negative      | Negative       | Negative       |
| 14     | Negative                        | Negative       | Negative                        | Negative      | Negative       | Negative       |
|        |                                 | Negative       |                                 | Negative      | Negative       | Negative       |

C<sub>T</sub>: Cycle Threshold; Tp: Time to positivity in mm:ss; ONSwab: Combined oro and nasopharyngeal swab

**Table 8.** Repeatability and inter-operator reproducibility

| Sample                                       | Reaction       | rRT-PCR<br>(C <sub>T</sub> ) | Mean Tp<br>(% coefficient of variation) |              |              | Reproducibility<br>between<br>operators |
|----------------------------------------------|----------------|------------------------------|-----------------------------------------|--------------|--------------|-----------------------------------------|
|                                              |                |                              | Operator 1                              | Operator 2   | Operator 3   |                                         |
| ONSwab<br>(RNA diluted 1/10)                 | RNA-RT-LAMP    | 21.64                        | 05:16 (0.61)                            | 05:03 (0.51) | 04:48 (0.26) | 05:02 (4.72)                            |
| Qnostics positive control<br>(diluted 1/10)  | RNA-RT-LAMP    | 24.94                        | 06:05 (1.44)                            | 05:54 (1.22) | 05:41 (1.08) | 05:54 (3.38)                            |
| Qnostics positive control<br>(diluted 1/100) | RNA-RT-LAMP    | 29.27                        | 07:08 (4.24)                            | 07:09 (2.72) | 06:48 (6.06) | 07:02 (2.85)                            |
| ONSwab<br>(Swab VTM diluted 1/20)            | Direct-RT-LAMP | 25.50                        | 07:11 (7.28)                            | 07:45 (8.48) | 07:38 (7.40) | 07:31 (3.94)                            |

VTM: Viral Transport Medium. C<sub>T</sub>: Cycle Threshold; ONSwab: Combined oro and nasopharyngeal swab; Tp: Time to positivity in mm:ss

**Table 9.** Inter-platform reproducibility

| Sample                                       | Reaction       | rRT-PCR<br>(C <sub>T</sub> ) | Mean Tp<br>(% coefficient of variation) |              | Reproducibility<br>between platforms |
|----------------------------------------------|----------------|------------------------------|-----------------------------------------|--------------|--------------------------------------|
|                                              |                |                              | Genie® HT                               | Genie® III   |                                      |
| ONSwab<br>(RNA diluted 1/10)                 | RNA-RT-LAMP    | 21.64                        | 05:16 (0.61)                            | 04:49 (0.61) | 05:02 (6.37)                         |
| Qnostics positive control<br>(diluted 1/10)  | RNA-RT-LAMP    | 24.94                        | 06:05 (1.44)                            | 05:39 (1.33) | 05:52 (5.35)                         |
| Qnostics positive control<br>(diluted 1/100) | RNA-RT-LAMP    | 29.27                        | 07:08 (4.24)                            | 06:46 (4.54) | 06:57 (3.71)                         |
| ONSwab<br>(Swab VTM diluted 1/20)            | Direct-RT-LAMP | 25.50                        | 07:11 (7.28)                            | 06:41 (4.40) | 06:56 (5.16)                         |

VTM: Viral Transport Medium. C<sub>T</sub>: Cycle Threshold; ONSwab: Combined oro and nasopharyngeal swab; Tp: Time to positivity in mm:ss

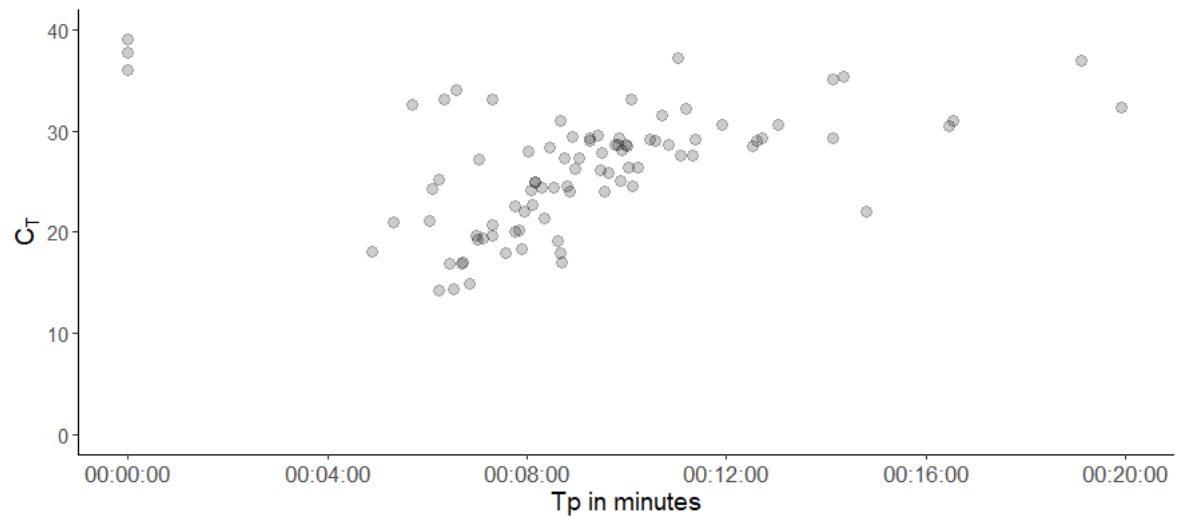

**Figure 1.** RNA RT-LAMP time to positivity (Tp: ss:mm:hh) of individual samples plotted against rRT-PCR  $C_T$  values. Data points represent 86 SARS-CoV-2 positive ( $C_T \leq 45$ ) clinical samples (as determined by rRT-PCR).

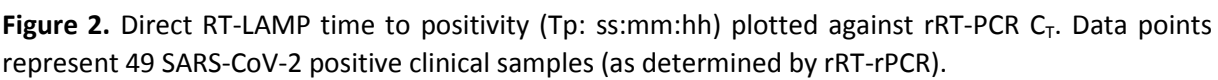

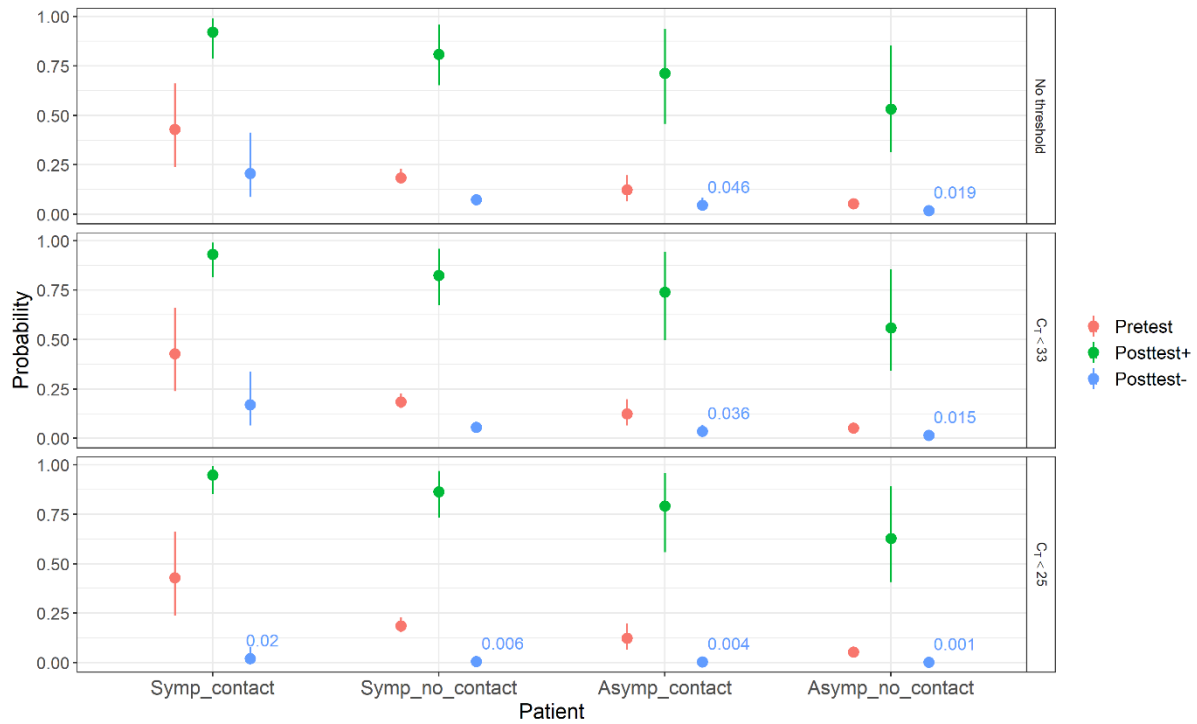

**Figure 3.** Pre- and post-test probability of infection and the use of Direct RT-LAMP. Probabilities are shown as mean (points) and 95% confidence intervals (error bars). Four risk categories of patients are considered (x axis): 1) Symp\_contact = symptomatic patient with history of contact with an infected person, 2) Symp\_no\_contact = symptomatic patient who had no contact with an infected or sick person, 3) Asymp\_contact = asymptomatic patient with history of contact with an infected person and 4) Asymp\_no\_contact = asymptomatic patient who had no contact with an infected or sick person. Post-test probability negative values  $\leq 0.05$  are also shown in the figure.

## Supplementary information

### Linking pre- and post-test probability of infection

In clinical practice diagnosis is made using a combination of the patient pre-test probability of being infected and the test result. The combination of these two will lead to an estimation of the post-test probability of infection. It is this final estimate which would help the practitioner's decision making.

In our study, the pre- and post-test probability of infection were estimated using an scenario-tree model, where different risks for infection in the estimation of the pre-test probabilities are taken into consideration<sup>19</sup>.

### Pre-test probability of infection

In this model the pre-test probability of infection  $P_{pre}$  was given by:

$$P_{pre} = p * ARR_s * ARR_c$$

Where  $p$  is the prevalence of infection in the population,  $ARR_s$  is the adjusted risk ratio for infection of a symptomatic or asymptomatic patient and  $ARR_c$  is the risk ratio of a patient being infected who did have a risk contact compared with a patient who did not have a risk contact (Table S1). The ARR were calculated as follows:

$$ARR_i = \frac{RR_i}{(RR_i * Prop_i) + (RR_j + Prop_j)}$$

Where  $i$ , for example is an indicator for symptomatic and  $j$  is an indicator for asymptomatic. The variable  $Prop$  is the expected proportion (in this example) of either symptomatic or asymptomatic patients.

### Post-test probability of infection

First the pre-test odds were calculated as  $Odd_{pre} = P_{pre} / (1 - P_{pre})$ , then the post-test odds of infection were calculated as follows:

$$Odds(+) = Odds_{pre} * LRT(+)$$

$$Odds(-) = Odds_{pre} * LRT(-)$$

Where LRT are the positive or negative likelihood ratios of the Direct RT-LAMP:

$$LRT(+) = \frac{Sensitivity}{1 - Specificity}$$

$$LRT(-) = \frac{1 - Sensitivity}{Specificity}$$

These LRT were calculated using the Direct RT-LAMP's DSe and DSp estimates for the different viral load scenarios considered (estimated from  $C_T$ 's: 1) "No  $C_T$  cut off" (high-low viral load), 2) " $C_T$  cut off <33" (high-moderate viral load) and 3)  $C_T$  cut off <25.

Finally, the post-test odds were transformed to post-test probabilities of infection  $P_{post}$

$$P_{post} = Odds / (1 + Odds)$$

The model was implemented in Microsoft® Excel® using the add-in software Poptools<sup>20</sup>. For estimation of pre and post probabilities (mean and 95% confidence intervals), stochastic simulations of 1000 iterations were performed. Table S1 summarises the parameter values used. It should be noted that these values are crude approximations which were made only as an example of and to help understand the use of Direct RT-LAMP in practice. We encourage the readers who would like to use this model to quantify pre-and post-test probabilities of infection to better estimate the parameter values according to the epidemiological situation of the country/region where the test would be applied.

Alternatively, once the pre-test probabilities are estimated, post-test probabilities can be approximated using a Fagan nomogram<sup>35</sup>.

Table S1 Values of the parameters used for estimation of the pre- and post-test probabilities of infection

| Parameter                          | Value                 | Description                                                                                                                                                                                                                                                                                                    | Reference       |
|------------------------------------|-----------------------|----------------------------------------------------------------------------------------------------------------------------------------------------------------------------------------------------------------------------------------------------------------------------------------------------------------|-----------------|
| Prevalence (p)                     | 0.14 (14%)            | Proportion of positive patients tested regardless of being symptomatic or asymptomatic                                                                                                                                                                                                                         | 31              |
| Proportion asymptomatic (Propasym) | Pert(0.08,0.31,0.54)a | Proportion of asymptomatic infected people.<br>Propsymp = 1-Propasym                                                                                                                                                                                                                                           | 36              |
| Risk Ratio symptomatic (RRsymp)    | Pert(2.5,3.5,4.5)a    | This RR was approximated as the ratio of the positive rate of symptomatic patients (0.78) to the positive rate of asymptomatic patients (0.22). The reference for this RR are the asymptomatic (RRasym = 1).                                                                                                   | 31              |
| Risk Ratio contact risk (RRc)      | Pert(1.3,2.3,3.3)a    | This RR was approximated as the ratio of the positive rate when tests were done only on symptomatic patients and their contacts (0.33) to the positive rate when tests were done regardless of clinical state (0.14). The reference for this RR is the no-contact (patient had not risk contact) (RRc-no = 1). | 31              |
| Proportion risk contacts           | 0.5                   | For simplicity we assumed equal proportion of patients with no risk and with risk contacts                                                                                                                                                                                                                     |                 |
| Sensitivity                        | Pert(0.52,0.67,0.80)a | An example of the values of Direct RT-LAMP used directly on the sample in the scenario of "No CT cut off" (high-low viral load). Similarly Sensitivity values for the other scenarios were introduced in the model assigning a Pert distribution.                                                              | This manuscript |
| Specificity                        | Pert(0.90,0.97,1.00)a | See explanation given for Se.                                                                                                                                                                                                                                                                                  | This manuscript |

a Pert distribution (a,b,c) where a = the minimum, b = the most likely and c = the maximum values.
